# Supplementary material for: Enhanced permittivity in polymer blends via tailoring the orderliness of semiconductive liquid crystalline polymers and intermolecular interactions
Source: Royal Society of Chemistry journal article supplement (doi:10.1039/d0tc00766h), 2020-01-01
Supplement: d0tc00766h1.pdf [file d0tc00766h1.pdf]

## Supporting Information

### **Enhanced permittivity in polymer blends via tailoring the orderliness of semiconductive liquid crystalline polymers and intermolecular interactions**

Kun Qian<sup>a</sup>, Rui Qiao<sup>a</sup>, Sheng Chen<sup>\*a</sup>, Hang Luo<sup>\*b</sup> and Dou Zhang<sup>b</sup>

<sup>a</sup> Key Laboratory of Polymeric Materials and Application Technology of Hunan Province, College of Chemistry, Xiangtan University, Xiangtan 411105, Hunan Province, China

<sup>b</sup> State Key Laboratory of Powder Metallurgy, Central South University, Changsha, Hunan 410083, China

**Table S1. Abbreviation and full name**

| Abbreviation                                      | Full name                                                               |
|---------------------------------------------------|-------------------------------------------------------------------------|
| MHT                                               | 2-[3,6,7,10,11-pentakis(hexyloxy)-2-oxytriphenylene] ethyl methacrylate |
| M9F                                               | 2-(perfluorobutyl) ethyl methacrylate                                   |
| PHT                                               | poly{2-[3,6,7,10,11-pentakis(hexyloxy)-2-oxytriphenylene] methacrylate} |
| P9F                                               | poly [2-(perfluorobutyl) ethyl methacrylate]                            |
| RAFT                                              | reversible-addition–fragmentation chain transfer                        |
| PVDF                                              | poly(vinylidene fluoride)                                               |
| THF                                               | tetrahydrofuran                                                         |
| DMF                                               | dimethylformamide                                                       |
| BaTiO <sub>3</sub>                                | barium titanate                                                         |
| SrTiO <sub>3</sub>                                | strontium titanate                                                      |
| CaCu <sub>3</sub> Ti <sub>4</sub> O <sub>12</sub> | calcium copper titanate                                                 |
| PTTEMA                                            | poly{2-(2, 2':5', 2'' -terthien-5-yl)ethyl methacrylate}                |
| PCMS                                              | poly(p-chloromethyl styrene)                                            |
| PPy                                               | polypyrrole                                                             |
| PANI                                              | polyaniline                                                             |
| CuPc                                              | copper phthalocyanine oligomer                                          |
| PVDF-CTFE                                         | poly(vinylidene fluoride-chlorotrifluoroethylene)                       |
| AIBN                                              | azodiisobutyronitrile                                                   |
| CTA                                               | 2-(dodecylthiocarbonothioylthio)-2-methylpropionic acid                 |
| M <sub>w</sub>                                    | weight-average molecular weight                                         |
| M <sub>n</sub>                                    | number-average molecular weight                                         |
| TMS                                               | tetramethylsilane                                                       |
| NMR                                               | nuclear magnetic resonance                                              |
| GPC                                               | gel permeation chromatography                                           |
| DSC                                               | differential scanning calorimetry                                       |
| 1D WAXD                                           | one-dimensional wide-angle X-ray diffraction                            |
| SAXS                                              | small-angle X-ray scattering                                            |
| FT-IR                                             | fourier-transform infrared                                              |
| TGA                                               | thermogravimetric analysis                                              |
| SEM                                               | scanning electron microscopy                                            |
| POM                                               | polarized optical microscopy                                            |
| PDI                                               | polydispersity index                                                    |
| T <sub>i</sub>                                    | clearing point                                                          |
| T <sub>d</sub>                                    | thermal decomposition temperatures                                      |
| X <sub>c</sub>                                    | crystallinity                                                           |
| ΔH <sub>m</sub>                                   | melting enthalpy                                                        |
| W <sub>f</sub>                                    | mass ratio                                                              |
| ε                                                 | dielectric constant                                                     |

## Characterization

Nuclear magnetic resonance (NMR) measurements were performed on a Bruker ARX400 MHz spectrometer using with  $\text{CDCl}_3$  as solvent, tetramethylsilane (TMS) as the internal standard at room temperature.

Gel permeation chromatography (GPC). The apparent number average molecular weight ( $M_n$ ) and polydispersity index ( $\text{PDI} = M_w/M_n$ ) were measured on a GPC (WATERS 1515) instrument with a set of HT3, HT4 and HT5. The  $\mu$ -styragel columns used THF as an eluent and the flow rate was 1.0 mL/min at 38 °C. The GPC data were calibrated with polystyrene standards.

Differential scanning calorimetry (DSC). DSC traces of the polymer were obtained using a TA Q10 DSC instrument. The temperature and heat flow were calibrated using standard materials (indium and zinc) at a cooling and heating rates of 10 °C/min. The sample with a typical mass of about 5 mg was encapsulated in sealed aluminium pans.

Powder 1D WAXD experiments were performed on a BRUKER AXS D8 advance diffractometer with a 40 kV FL tubes as the X-ray source (Cu Ka) and a LYNXEYE\_XE detector. The scanning speed of 1D WAXD was 2°/min.

Small-angle X-ray scattering (SAXS). SAXS were performed with a high-flux SAXS instrument (SAXSess, Anton Paar), equipped with Kratky block-collimation system and a Philips PW 3830 sealed-tube X-ray generator (Cu Ka).

Fourier-transform infrared (FT-IR) spectroscopy was performed with a Nicolet 6700 instrument over the range of 4000~600  $\text{cm}^{-1}$  to determine the functionalization of the samples.

Thermogravimetric analysis (TGA) was performed on a TA SDT 2960 instrument at a heating rate of 20 °C/min in a nitrogen atmosphere.

The morphology of the composites was performed by scanning electron microscopy (SEM, JSM-6390).

Liquid crystalline texture of the polymers was examined under polarized optical microscopy (POM, Leica DM-LMP) equipped with a Mettler-Toledo hot stage (FP82HT).

Frequency-dependent dielectric constant, dielectric loss and conductivity were measured using an Agilent 4294A LCR meter with a frequency range from 100 Hz to 10 MHz.

**Table S2. Physical properties of three kinds of polymer alloy films under different polymer content.**

| Sample                 | $T_m$ (K) <sup>a</sup> | $\Delta H_m$ (J/g) <sup>b</sup> | $X_c$ (%) <sup>c</sup> |
|------------------------|------------------------|---------------------------------|------------------------|
| PVDF                   | 431.87                 | 24.68                           | 24.03                  |
| 1%PHT/PVDF             | 432.51                 | 31.14                           | 30.63                  |
| 3%PHT/PVDF             | 432.55                 | 31.09                           | 31.21                  |
| 5%PHT/PVDF             | 435.26                 | 28.20                           | 28.90                  |
| 10%PHT/PVDF            | 433.17                 | 29.23                           | 31.62                  |
| 15%PHT/PVDF            | 433.24                 | 27.40                           | 31.39                  |
| 20%PHT/PVDF            | 433.65                 | 26.77                           | 32.58                  |
| 30%PHT/PVDF            | 433.24                 | 18.92                           | 26.32                  |
| 40%PHT/PVDF            | 433.52                 | 15.47                           | 25.11                  |
| PVDF                   | 431.87                 | 24.68                           | 24.03                  |
| 5%PHT- <i>co</i> -P9F  | 431.55                 | 29.82                           | 30.56                  |
| 10%PHT- <i>co</i> -P9F | 431.64                 | 27.21                           | 29.44                  |
| 15%PHT- <i>co</i> -P9F | 431.69                 | 26.45                           | 30.30                  |
| 20%PHT- <i>co</i> -P9F | 432.27                 | 23.92                           | 29.11                  |
| 30%PHT- <i>co</i> -P9F | 431.46                 | 20.64                           | 28.71                  |
| 40%PHT- <i>co</i> -P9F | 431.45                 | 17.42                           | 28.27                  |
| 50%PHT- <i>co</i> -P9F | 431.50                 | 13.89                           | 27.05                  |
| PVDF                   | 431.87                 | 24.68                           | 24.03                  |
| 5%PHT- <i>b</i> -P9F   | 432.19                 | 29.71                           | 30.45                  |
| 10%PHT- <i>b</i> -P9F  | 432.13                 | 29.03                           | 31.41                  |
| 15%PHT- <i>b</i> -P9F  | 431.87                 | 26.08                           | 29.88                  |
| 20%PHT- <i>b</i> -P9F  | 432.01                 | 24.74                           | 30.11                  |
| 30%PHT- <i>b</i> -P9F  | 431.78                 | 20.28                           | 28.21                  |
| 40%PHT- <i>b</i> -P9F  | 431.51                 | 18.63                           | 30.23                  |
| 50%PHT- <i>b</i> -P9F  | 431.63                 | 15.55                           | 30.28                  |

<sup>a</sup> The melting temperatures ( $T_m$ ) were measured by DSC at a heating rate of 10 °C/min under nitrogen atmosphere during the second heating process.

<sup>b</sup> $\Delta H_m$ : the value of the melting enthalpy of the sample resulting from the second DSC heating process

<sup>c</sup>  $X_c$ : the crystallinity.

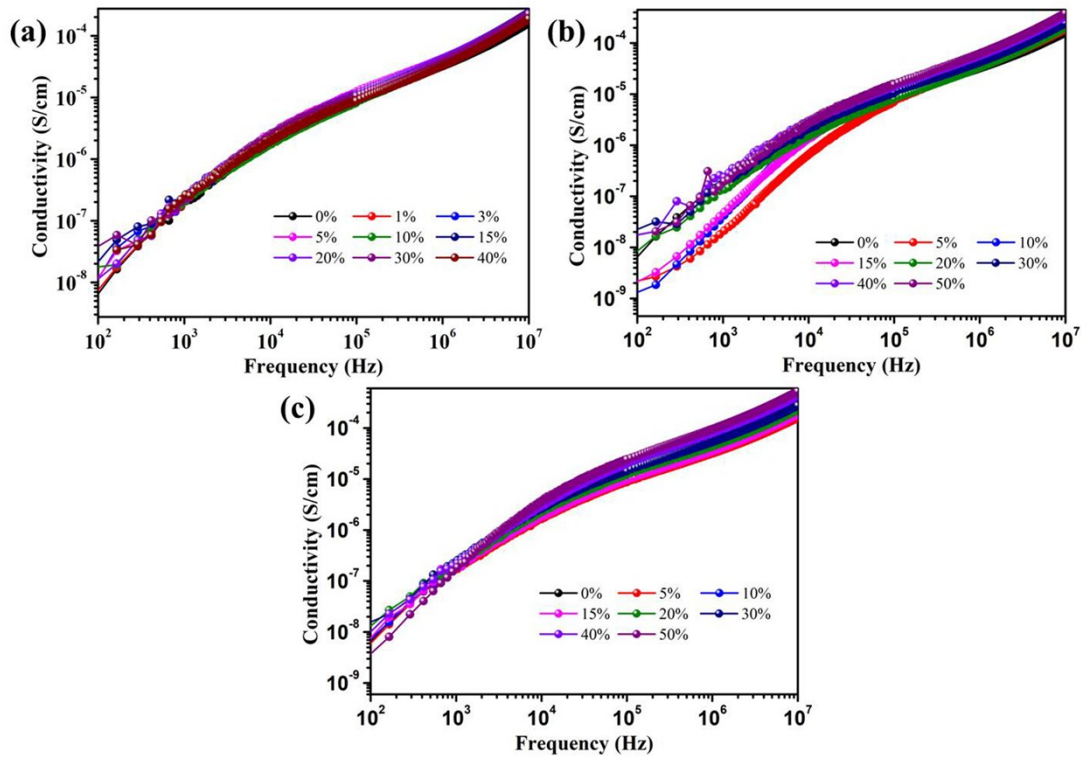

Figure S1. Frequency dependence of the conductivity of (a) PHT/PVDF; (b) PHT-*co*-P9F/PVDF and (c) PHT-*b*-P9F/PVDF polymer alloys at room temperature.
